# Supplementary material
Source: PubMed Central journal article supplement (PMC5010922)
Supplement: NIHMS800299-supplement-2.pdf [file NIHMS800299-supplement-2.pdf]

**Table S1.** Spearman correlations between OPN levels and AFP, CRP or liver function markers among HCC Cases and among Controls.

|                              | <b>Spearman correlation with OPN, ng/ml</b> |         |                   |         |
|------------------------------|---------------------------------------------|---------|-------------------|---------|
|                              | Controls (n=194)                            |         | HCC cases (n=100) |         |
|                              | R                                           | p-value | R                 | p-value |
| AFP, ng/ml                   | -0.02                                       | 0.829   | 0.24              | 0.022   |
| CRP, mg/l                    | 0.12                                        | 0.107   | 0.38              | <0.001  |
| ALT, U/l                     | -0.21                                       | 0.004   | -0.02             | 0.818   |
| AST, U/l                     | -0.13                                       | 0.074   | 0.21              | 0.039   |
| GGT, U/l                     | -0.06                                       | 0.371   | 0.25              | 0.014   |
| ALP, U/l                     | 0.06                                        | 0.418   | 0.36              | <0.001  |
| Albumin, g/l                 | -0.37                                       | <.0001  | -0.48             | <0.001  |
| Total bilirubin, $\mu$ mol/l | -0.02                                       | 0.810   | 0.12              | 0.237   |

Spearman correlation coefficients were adjusted for age at recruitment and sex.

**Table S2.** Odds ratios (OR) and 95% confidence intervals [95% CI] of hepatocellular carcinoma per 10% increase in circulating OPN levels (ng/ml)<sup>a</sup> in the EPIC nested case-control study.

| <b>Model</b>                     | <b>N° HCC cases</b> | <b>OPN mean (SD),<br/>median (ng/ml)</b> | <b>OR [95% CI]<sup>b</sup></b> |
|----------------------------------|---------------------|------------------------------------------|--------------------------------|
| All data                         | 100                 | 66.5 (61.7), 56.0                        | 1.30 [1.14-1.48]               |
| <b>Additionally adjusted for</b> |                     |                                          |                                |
| AFP, ng/ml                       | 100                 | -                                        | 1.19 [1.05-1.35]               |
| BARD score                       | 100                 | -                                        | 1.30 [1.14-1.48]               |
| AST/ALT ratio                    | 100                 | -                                        | 1.29 [1.14-1.48]               |
| ALT, U/l                         | 100                 | -                                        | 1.25 [1.08-1.43]               |
| AST, U/l                         | 100                 | -                                        | 1.19 [1.02-1.38]               |
| GGT, U/l                         | 100                 | -                                        | 1.25 [1.07-1.46]               |
| ALP, U/l                         | 100                 | -                                        | 1.18 [1.02-1.37]               |
| Albumin, g/l                     | 100                 | -                                        | 1.21 [1.06-1.38]               |
| Total bilirubin, µmol/l          | 100                 | -                                        | 1.26 [1.11-1.44]               |
| HBV/HCV status                   | 100                 | -                                        | 1.26 [1.11-1.43]               |
| <b>Stratified analyses</b>       |                     |                                          |                                |
| <b>By sex</b>                    |                     |                                          |                                |
| Men                              | 70                  | 70.0 (71.9), 57.2                        | 1.44 [1.19-1.74]               |
| Women                            | 30                  | 58.3 (23.9), 54.4                        | 1.07 [0.87-1.32]               |
| <b>By years of follow-up</b>     |                     |                                          |                                |
| < 2 y                            | 21                  | 144.8 (199.6), 69.9                      | 2.51 [1.06-5.95]               |
| 2-6 y                            | 40                  | 70.8 (32.8), 59.5                        | 1.45 [1.13-1.85]               |

|                                  |    |                   |                  |
|----------------------------------|----|-------------------|------------------|
| > 6 y                            | 39 | 58.1 (23.5), 54.0 | 1.05 [0.89-1.24] |
| <b>By viral hepatitis status</b> |    |                   |                  |
| HBV/HCV positive                 | 27 | 64.1 (20.8), 59.4 | 2.45 [1.24-4.83] |
| HBV/HCV negative                 | 70 | 67.1 (66.2), 55.2 | 1.19 [1.05-1.34] |
| <b>Sensitivity analyses</b>      |    |                   |                  |
| AFP < 20 ng/ml                   | 87 | 64.1 (55.0), 55.2 | 1.24 [1.10-1.41] |
| AFP < 10 ng/ml                   | 75 | 63.7 (56.5), 54.5 | 1.23 [1.09-1.41] |
| Non-diabetic                     | 80 | 68.2 (66.5), 56.4 | 1.40 [1.18-1.66] |

---

<sup>a</sup> OPN levels correspond to a 10% increment after log transformation.

<sup>b</sup> ORs and 95% CIs estimated by conditional logistic regression conditioned on the matching factors and adjusted for body mass index (kg/m<sup>2</sup>, continuous), smoking status (never, former, current, unknown), baseline alcohol intake (g/d, continuous), and lifetime alcohol intake pattern (never drinkers, former drinkers, drinkers only at recruitment, lifetime drinkers, unknown).

**Table S3:** Random repeated assignment of cases and their matched controls to classifier calibration (80% of subjects) and classifier validation (remainder 20% of subjects) components.

|                       | <b>Classifier calibration</b><br><b>AUC [95%CI]</b> | <b>Classifier validation</b><br><b>AUC [95% CI]</b> |
|-----------------------|-----------------------------------------------------|-----------------------------------------------------|
| <b>SAMPLE SET 1</b>   |                                                     |                                                     |
| OPN                   | 0.71 [0.64-0.79]                                    | 0.67 [0.52-0.81]                                    |
| AFP                   | 0.77 [0.70-0.83]                                    | 0.74 [0.60-0.89]                                    |
| OPN+AFP               | 0.79 [0.73-0.86]                                    | 0.73 [0.59-0.86]                                    |
| OPN+liver enzymes     | 0.86 [0.80-0.92]                                    | 0.85 [0.73-0.97]                                    |
| OPN+AFP+liver enzymes | 0.87 [0.81-0.93]                                    | 0.84 [0.73-0.96]                                    |
| <b>SAMPLE SET 2</b>   |                                                     |                                                     |
| OPN                   | 0.69 [0.62-0.76]                                    | 0.76 [0.61-0.90]                                    |
| AFP                   | 0.78 [0.71-0.84]                                    | 0.71 [0.56-0.85]                                    |
| OPN+AFP               | 0.79 [0.72-0.85]                                    | 0.78 [0.64-0.93]                                    |
| OPN+liver enzymes     | 0.86 [0.80-0.92]                                    | 0.82 [0.70-0.94]                                    |
| OPN+AFP+liver enzymes | 0.87 [0.81-0.92]                                    | 0.78 [0.64-0.91]                                    |
| <b>SAMPLE SET 3</b>   |                                                     |                                                     |
| OPN                   | 0.72 [0.65-0.79]                                    | 0.64 [0.48-0.80]                                    |
| AFP                   | 0.75 [0.68-0.82]                                    | 0.82 [0.72-0.93]                                    |
| OPN+AFP               | 0.78 [0.71-0.85]                                    | 0.83 [0.72-0.93]                                    |
| OPN+liver enzymes     | 0.87 [0.81-0.92]                                    | 0.93 [0.86-1.00]                                    |
| OPN+AFP+liver enzymes | 0.87 [0.82-0.92]                                    | 0.93 [0.85-1.00]                                    |
| <b>SAMPLE SET 4</b>   |                                                     |                                                     |
| OPN                   | 0.70 [0.63-0.78]                                    | 0.69 [0.52-0.86]                                    |
| AFP                   | 0.75 [0.69-0.82]                                    | 0.79 [0.65-0.92]                                    |
| OPN+AFP               | 0.78 [0.72-0.85]                                    | 0.79 [0.66-0.92]                                    |
| OPN+liver enzymes     | 0.85 [0.79-0.91]                                    | 0.90 [0.80-1.00]                                    |
| OPN+AFP+liver enzymes | 0.86 [0.80-0.91]                                    | 0.91 [0.82-1.00]                                    |
| <b>SAMPLE SET 5</b>   |                                                     |                                                     |
| OPN                   | 0.70 [0.62-0.77]                                    | 0.74 [0.61-0.87]                                    |
| AFP                   | 0.77 [0.70-0.83]                                    | 0.76 [0.62-0.89]                                    |
| OPN+AFP               | 0.78 [0.71-0.84]                                    | 0.83 [0.73-0.94]                                    |
| OPN+liver enzymes     | 0.86 [0.80-0.92]                                    | 0.85 [0.75-0.96]                                    |
| OPN+AFP+liver enzymes | 0.86 [0.80-0.92]                                    | 0.88 [0.78-0.97]                                    |
| <b>Average</b>        |                                                     |                                                     |
| OPN                   | 0.71                                                | 0.70                                                |
| AFP                   | 0.76                                                | 0.76                                                |
| OPN+AFP               | 0.78                                                | 0.79                                                |
| OPN+liver enzymes     | 0.86                                                | 0.87                                                |

OPN+AFP+liver enzymes

0.86

0.87
